# Supplementary material for: Systemic infection modifies the neuroinflammatory response in late stage Alzheimer’s disease
Source: PubMed Central journal article supplement (PMC6127939; doi:10.1186/s40478-018-0592-3), 2018-09-07
Supplement: 40478_2018_592_MOESM1_ESM.pdf [file 40478_2018_592_MOESM1_ESM.pdf]

**Supplementary Table 1 – Characteristics of the primary antibodies, immunohistochemistry conditions and expression of the staining**

| <b>Antigen (human)</b>                  | <b>Company</b>    | <b>Host</b>         | <b>Pre-treatment</b>               | <b>Dilution</b> | <b>Predominant neuropathological features / cell type stained</b> | <b>Immune functions</b>                                                                                                                                                                                                                                                                                            |
|-----------------------------------------|-------------------|---------------------|------------------------------------|-----------------|-------------------------------------------------------------------|--------------------------------------------------------------------------------------------------------------------------------------------------------------------------------------------------------------------------------------------------------------------------------------------------------------------|
| <b>Amyloid (A)<math>\beta</math></b>    | Covance           | Mouse, clone 4G8    | 80% formic acid and citrate buffer | 1/2000          | Diffuse and neuritic plaques, cerebral amyloid angiopathy         |                                                                                                                                                                                                                                                                                                                    |
| <b>Phosphorylated Tau (pS202+pT205)</b> | Fisher Scientific | Mouse, clone AT8    | Citrate buffer                     | 1/500           | Tangles, dystrophic neurites, neuropil threads                    |                                                                                                                                                                                                                                                                                                                    |
| <b>Iba1</b>                             | Wako              | Rabbit              | Citrate buffer                     | 1/1000          | Microglia, perivascular macrophages                               | Cytoplasmic protein involved in cytoskeletal reorganization, membrane ruffling of the microglial processes and actin cross-linking needed for cell migration [51], reflecting microglial motility and migration properties. Higher expression of Iba1 is associated with good MMSE and absence of dementia [44].   |
| <b>CD68</b>                             | Abcam             | Mouse (clone PG-M1) | 0.5% pronase                       | 1/50            | Microglia, perivascular macrophages                               | CD68 labels lysosomal and endosomal transmembrane glycoprotein of microglia, indicating phagocytic activity [57]. CD68 is associated with worse MMSE, dementia and ptau [44].                                                                                                                                      |
| <b>HLA-DP,DQ,DR</b>                     | Dako              | Mouse, clone CR3/43 | Citrate buffer                     | 1/200           | Microglia, perivascular macrophages                               | HLA-DR is a Major Histocompatibility Class (MHC) II cell surface receptor which presents antigens to cells of the immune system eliciting an immune response, involved in the non-self recognition and upregulated in inflammation [63]. HLA was identified as a genetic risk factor for Alzheimer's disease [33]. |
| <b>CD64 (Fc<math>\gamma</math>RI)</b>   | R&D Systems       | Goat                | EDTA buffer                        | 1/100           | Microglia, perivascular macrophages                               |                                                                                                                                                                                                                                                                                                                    |

|                        |             |                       |                    |        |                                                                                         |                                                                                                                                                                                                                                                                                                                                                                                                                                                                                                                             |
|------------------------|-------------|-----------------------|--------------------|--------|-----------------------------------------------------------------------------------------|-----------------------------------------------------------------------------------------------------------------------------------------------------------------------------------------------------------------------------------------------------------------------------------------------------------------------------------------------------------------------------------------------------------------------------------------------------------------------------------------------------------------------------|
| <b>CD32a (FcγRIIa)</b> | Abcam       | Mouse (clone 13D7)    | EDTA buffer        | 1/2000 | Microglia, perivascular macrophages and in some neurons                                 | Fcγ receptors are central effectors of immunoglobulins (IgG) mediated immune response [48].                                                                                                                                                                                                                                                                                                                                                                                                                                 |
| <b>CD32b (FcγRIIb)</b> | Abcam       | Rabbit (clone EP888Y) | EDTA buffer        | 1/4000 | Neurons                                                                                 | CD64 has high affinity for the Fc portion of IgG, triggering a monocyte/macrophage response [67]. CD64 expression reflects the presence of IgG in the brain and thus the involvement of systemic immunity [41]. CD32a/b and CD16 are low/medium affinity receptors for immune complex [48]. CD32b, the only inhibitory receptor, is usually co-expressed with activating FcγR on the majority of innate immune cells [8, 28].                                                                                               |
| <b>CD16 (FcγRIII)</b>  | R&D Systems | Goat                  | EDTA buffer        | 1/150  | Microglia, perivascular macrophages, some monocytes and neurons                         |                                                                                                                                                                                                                                                                                                                                                                                                                                                                                                                             |
| <b>CHI3L1</b>          | R&D Systems | Goat                  | Citrate buffer, PC | 1/100  | Microglia, some neurons                                                                 | CHI3L1 (or YKL40), a highly evolutionary conserved secreted protein contains the conserved chitinase-like enzyme domain but lacks chitinolytic enzymatic activity. CHI3L1 is expressed by various cells [37], implicated in inflammatory disorders involving macrophage activation shown to be involved in promoting inflammation via regulation of M2/Th2-like immune reactions, leading to an immunosuppressive environment [11]. It is a potential neuroinflammatory biomarker for preclinical Alzheimer's disease [26]. |
| <b>IL4R</b>            | Sigma       | Rabbit                | EDTA buffer        | 1/100  | Occasional healthy neurons in Ctrl, tangles and neuropil threads in Alzheimer's disease | IL4/IL4R are anti-inflammatory molecules participating to the alternative activation of macrophages [8, 24].                                                                                                                                                                                                                                                                                                                                                                                                                |
| <b>CCR2</b>            | Abcam       | Rabbit, clone         | EDTA buffer        | 1/500  | Microglia, perivascular macrophages, monocytes                                          | CC-chemokine receptor 2 is required for mononuclear phagocyte recruitment [22] and upregulated in Alzheimer's disease brains [32], but not expressed by microglia in mouse brain [23].                                                                                                                                                                                                                                                                                                                                      |
| <b>CD3</b>             | Dako        | Mouse (clone F7.2.38) | None               | 1/200  | T lymphocytes                                                                           | CD3 is a T-cell co-receptor necessary to activate both CD8 <sup>+</sup> and CD4 <sup>+</sup> T cells [9], and thus considered as a pan-T cell marker.                                                                                                                                                                                                                                                                                                                                                                       |

**Supplementary Table 2 - Primers and probes used for TaqMan qPCR (human sequences)**

|                                         | Gene                           | Accession No.                                                         | Assay/Probe ID<br>(Thermo Fisher<br>Scientific) | Amplicon<br>Length<br>(bp) |
|-----------------------------------------|--------------------------------|-----------------------------------------------------------------------|-------------------------------------------------|----------------------------|
| <b>Cytokines/cytokine<br/>receptors</b> | <i>IL1<math>\beta</math></i>   | NM_000576.2                                                           | Hs01555410_m1                                   | 91                         |
|                                         | <i>IL6</i>                     | NM_000600.4                                                           | Hs00985639_m1                                   | 66                         |
|                                         | <i>TNF</i>                     | NM_000594.3                                                           | Hs99999043_m1                                   | 85                         |
|                                         | <i>IFN <math>\gamma</math></i> | NM_000619.2                                                           | Hs00989291_m1                                   | 73                         |
|                                         | <i>TGF <math>\beta</math></i>  | NM_000660.5                                                           | Hs00998133_m1                                   | 57                         |
|                                         | <i>IL10</i>                    | NM_000572.2                                                           | Hs00961622_m1                                   | 74                         |
|                                         | <i>IL4R</i>                    | NM_000418.3, NM_001257406.1, NM_001257407.1, NM_001257997.1           | Hs00166237_m1                                   | 70                         |
| <b>Enzymes</b>                          | <i>PTGS2 (COX2)</i>            | NM_000963.3                                                           | Hs00153133_m1                                   | 75                         |
|                                         | <i>NOS2</i>                    | NM_000625.4                                                           | Hs01075529_m1                                   | 67                         |
|                                         | <i>ARG1</i>                    | NM_000045.3, NM_001244438.1                                           | Hs00968979_m1                                   | 78                         |
| <b>Receptors</b>                        | <i>CD206 (MRC1)</i>            | NM_002438.3                                                           | Hs00267207_m1                                   | 82                         |
|                                         | <i>CD86</i>                    | NM_001206924.1, NM_001206925.1, NM_006889.4, NM_175862.4, NM_176892.1 | Hs01567026_m1                                   | 104                        |
|                                         | <i>TREM2</i>                   | NM_001271821.1, NM_018965.3                                           | Hs00219132_m1                                   | 73                         |
|                                         | <i>CD163</i>                   | NM_004244.5, NM_203416.3                                              | Hs00174705_m1                                   | 72                         |
| <b>Others</b>                           | <i>CHI3LI</i>                  | NM_001276.2                                                           | Hs00609691_m1                                   | 77                         |
|                                         | <i>GAPDH</i>                   | NM_001256799.2, NM_001289745.1, NM_001289746.1, NM_002046.5           | Hs02758991_g1                                   | 157                        |

**Supplementary Table 3 - Comparison of vascular proteins in Alzheimer's cases detected by V-PLEX Meso Scale Discovery Multiplex Assays**

| <b>Vascular injury panel 2 (pg/ml)</b> | <b>AD-</b>                         | <b>AD+</b>                          | <b>P value</b> |
|----------------------------------------|------------------------------------|-------------------------------------|----------------|
| CRP                                    | 53626.44<br>(13019.64, 85228.62)   | 55061.38<br>(27578.42, 90583.96)    | 0.461          |
| ICAM-1                                 | 65379.43<br>(41726.25, 89186.55)   | 60035.26<br>(43099.03, 96183.34)    | 0.722          |
| SAA                                    | 199894.72<br>(73367.75, 509940.34) | 397225.57<br>(102854.00, 549630.35) | 0.409          |
| VCAM-1                                 | 3458.52<br>(3038.75, 4607.98)      | 3081.83<br>(2396.07, 4348.85)       | 0.158          |

Values are median with IQR; p value by Mann-Whitney test.

AD, Alzheimer's disease cases; -, without systemic infection; +, with systemic infection; IQR, interquartile range
